# Supplementary material for: Experimental and theoretical studies of the acid-catalyzed conversion of furfuryl alcohol to levulinic acid in aqueous solution
Source: Royal Society of Chemistry journal article supplement (doi:10.1039/c2ee03465d), 2012-01-01

## Supporting Information

Experimental and Theoretical Studies of the Acid-Catalyzed Conversion of Furfuryl Alcohol to Levulinic Acid in Aqueous Solution

**Gretchen M. González Maldonado<sup>1</sup>, Rajeev S. Assary<sup>2,3</sup>, James Dumesic<sup>\*1</sup>, Larry A. Curtiss<sup>2,4</sup>**

<sup>1</sup> *Department of Chemical and Biological Engineering, University of Wisconsin-Madison, 1415 Engineering Drive, Madison, Wisconsin 53706, United States*

<sup>2</sup> *Materials Science Division, Argonne National Laboratory, Argonne, Illinois 60439*

<sup>3</sup> *Chemical & Biological Engineering, Northwestern University, Evanston, Illinois 60208*

<sup>4</sup> *Center for Nanoscale Materials, Argonne National Laboratory, Argonne, Illinois 60439,*

*\*Corresponding author: dumesic@engr.wisc.edu*

NMR Spectra

**Figure S 1.**  $^1\text{H}$  NMR spectra for intermediate A. This spectrum was referenced to diethyl ether that was part of the isolation process (2.2 – 3.0 ppm)

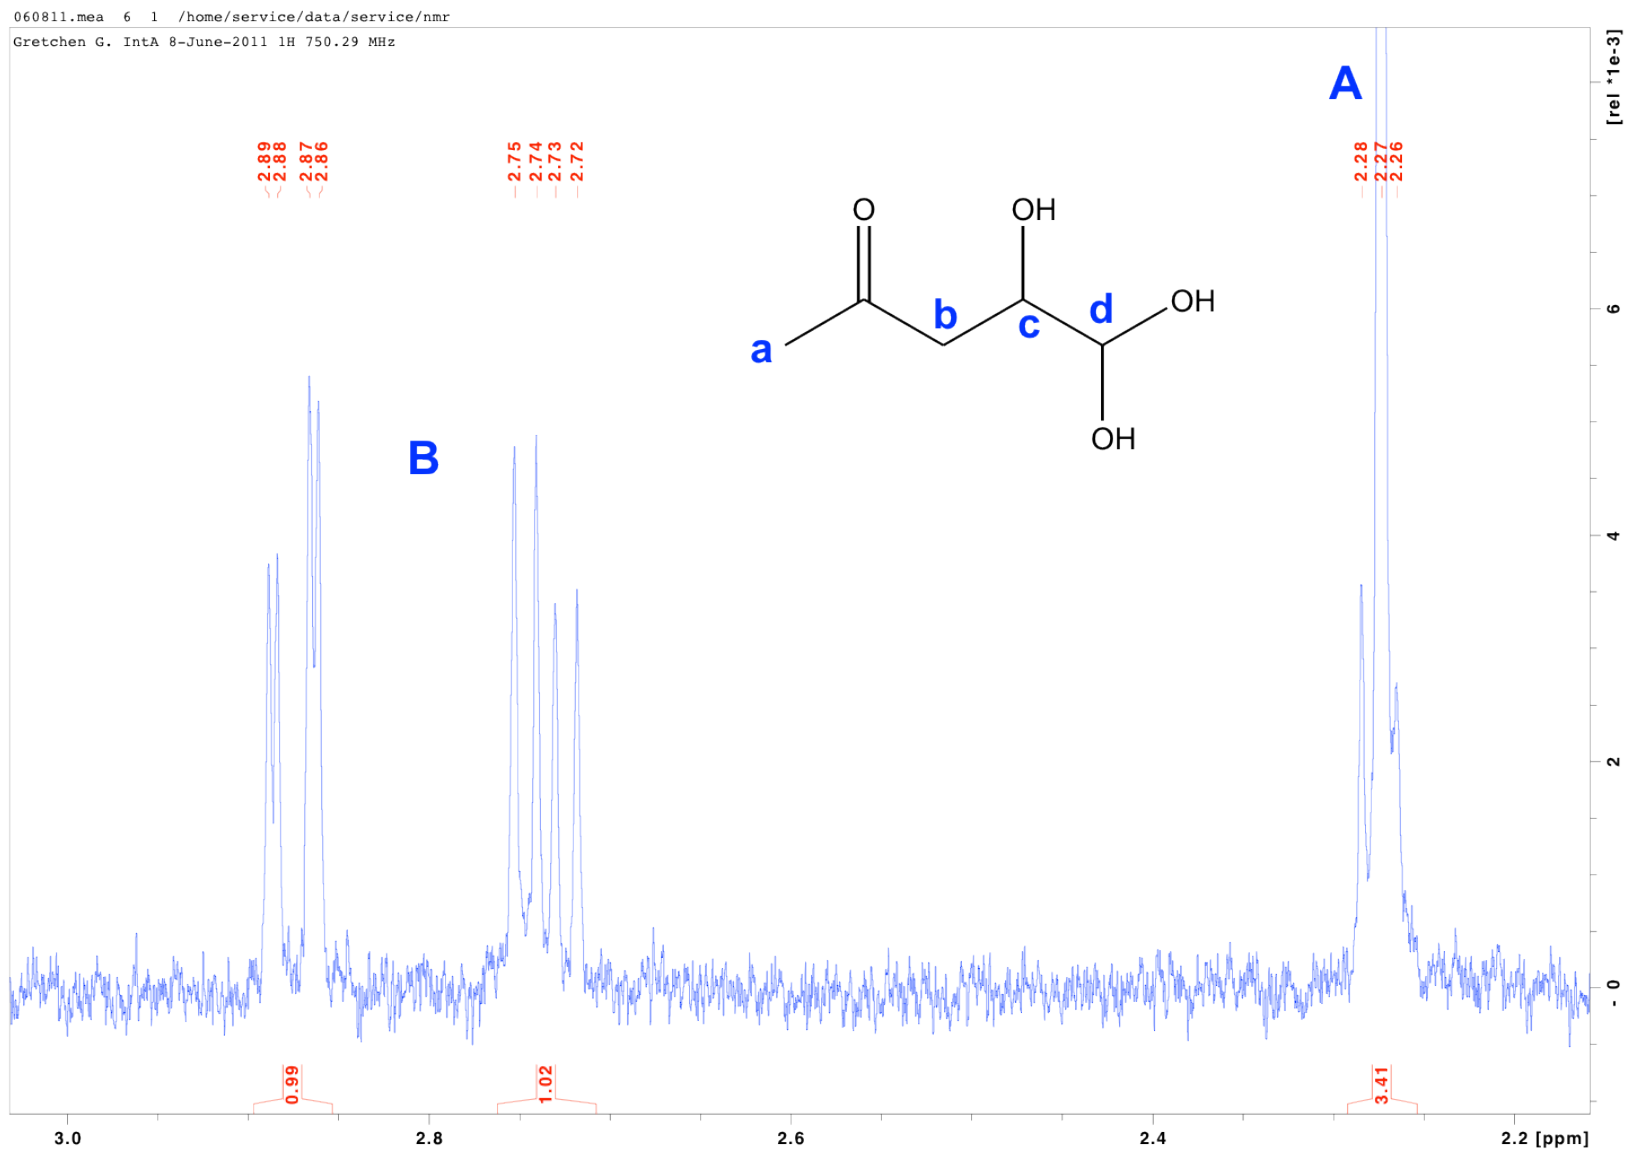

**Figure S 2.  $^1\text{H}$  NMR spectra for intermediate A. This spectrum was referenced to diethyl ether that was part of the isolation process (3.9 – 5.0 ppm)**

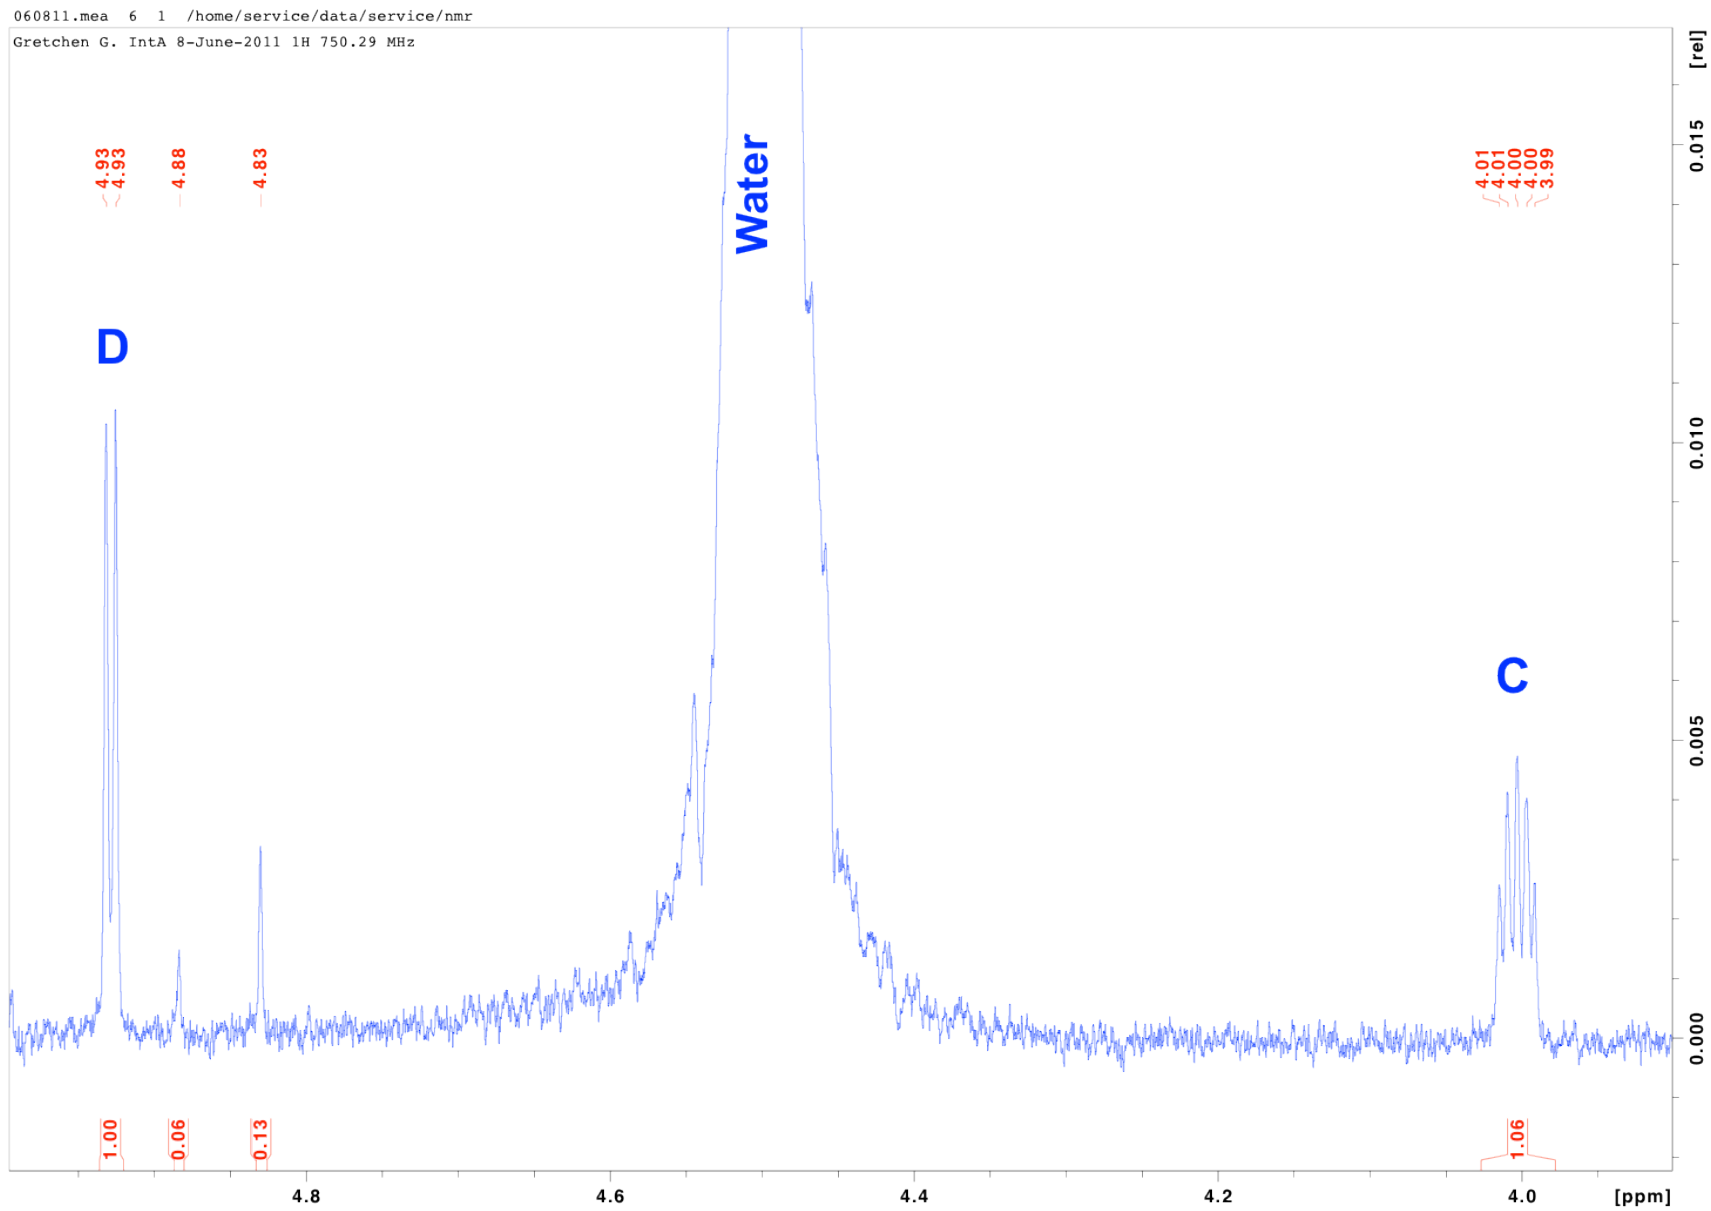

**Figure S 3. Intermediate B <sup>1</sup>H NMR (referenced to external DSS)**

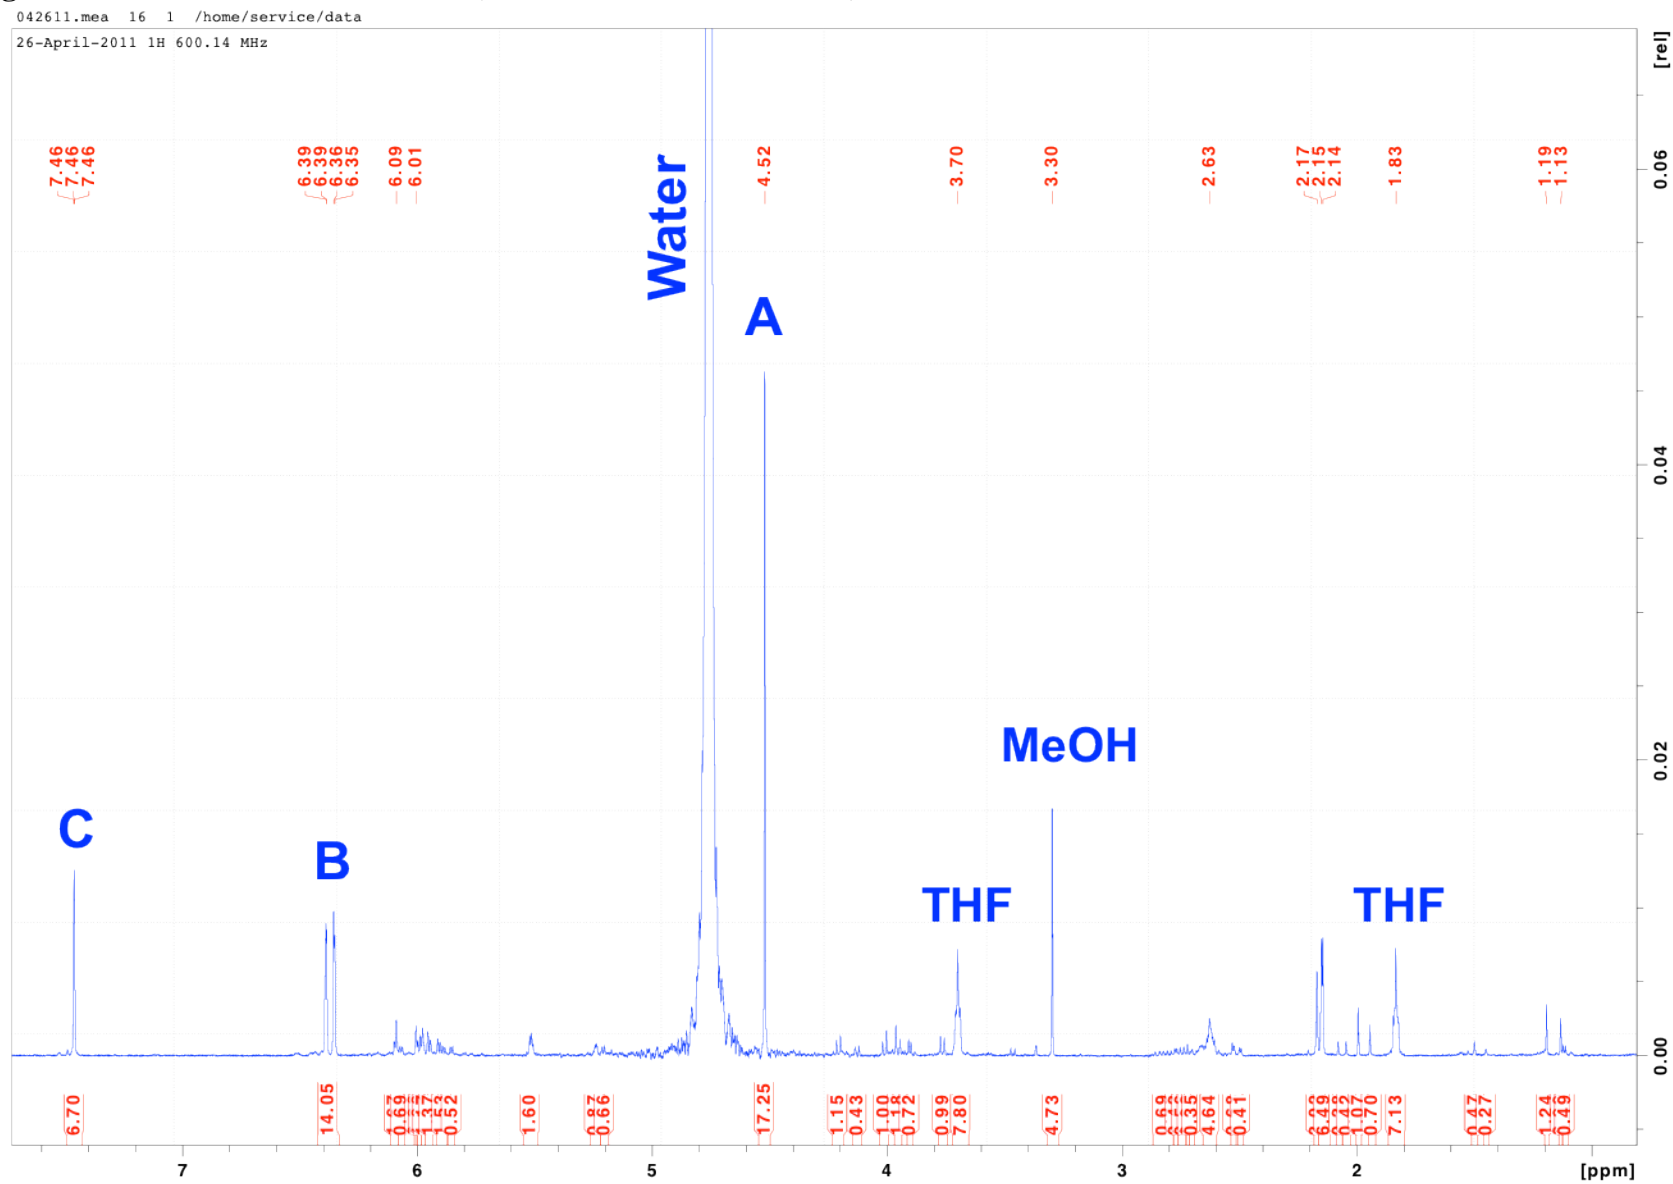

**Figure S 4.** FAL  $^1\text{H}$  NMR standard in  $\text{D}_2\text{O}$  (referenced to external DSS)

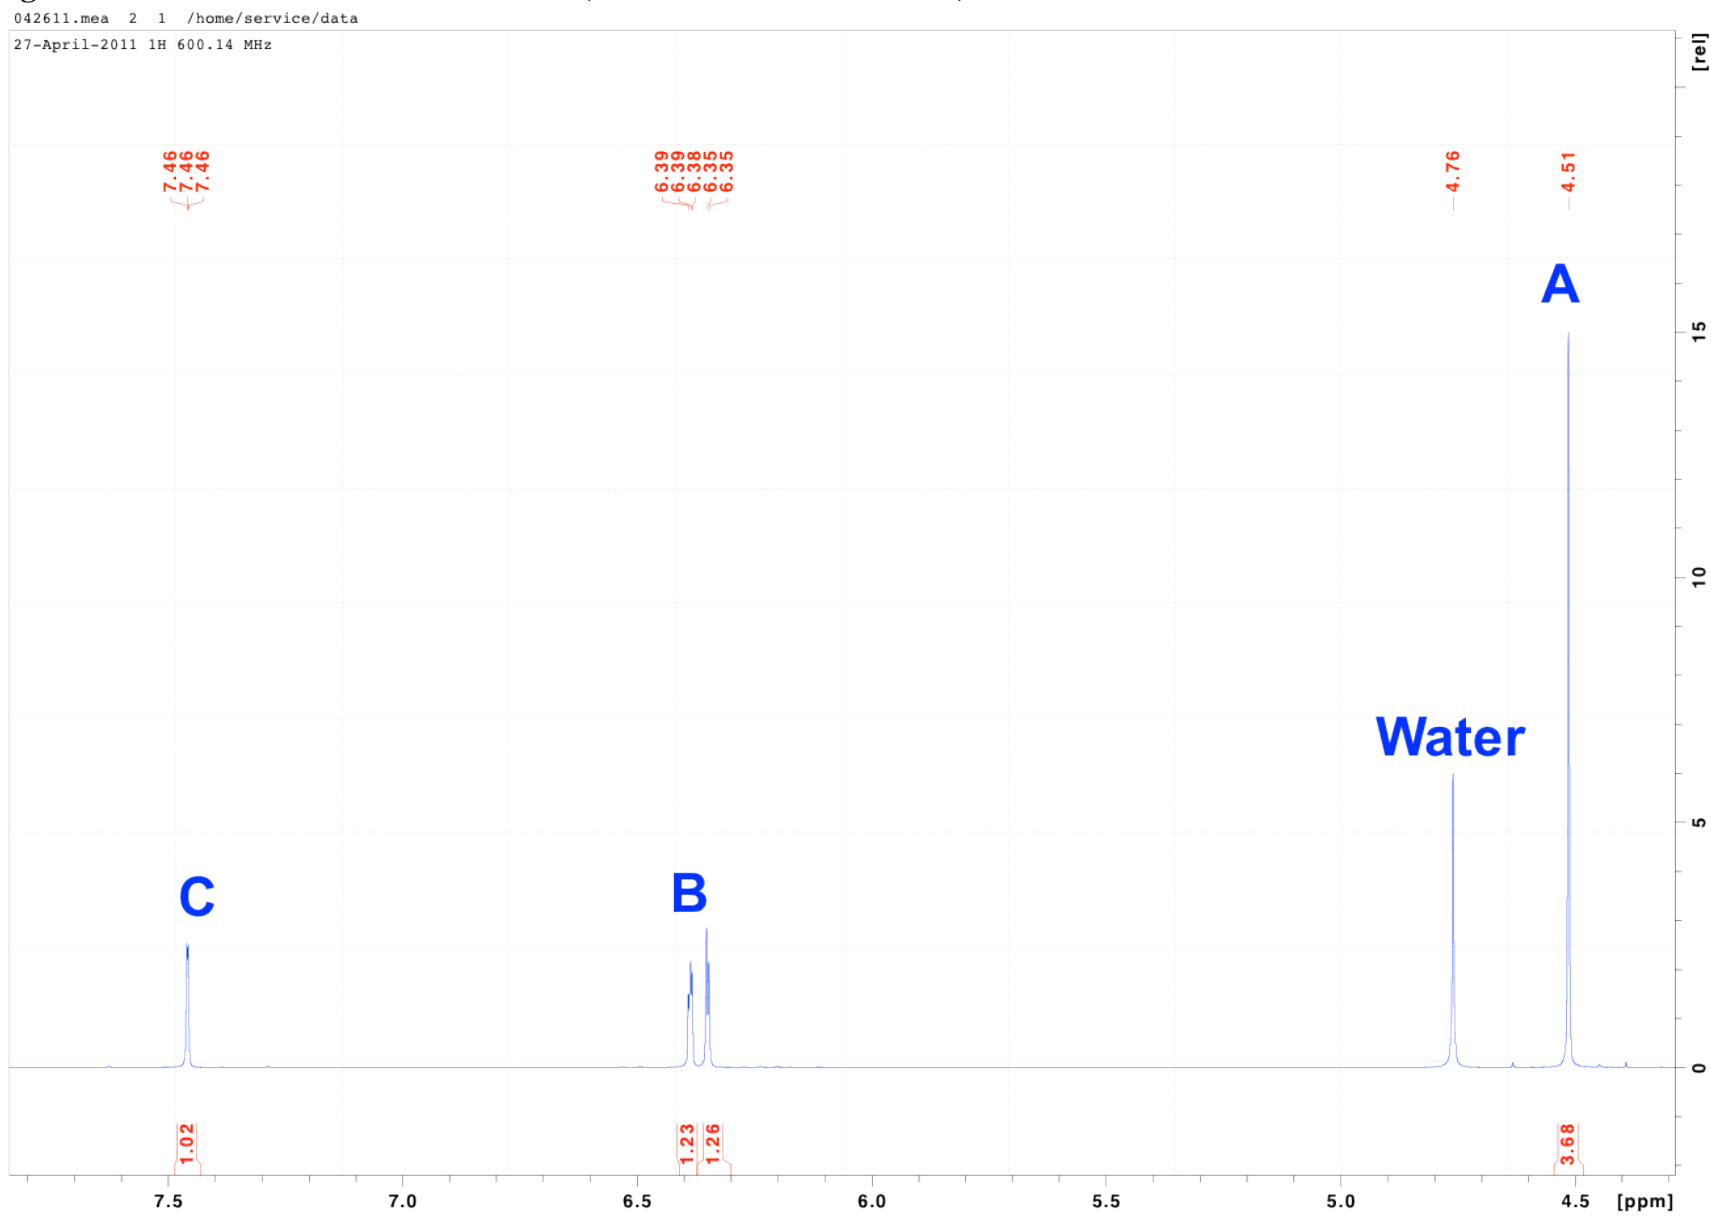

**Figure S 3. TOCSY NMR Spectrum of Intermediate A**

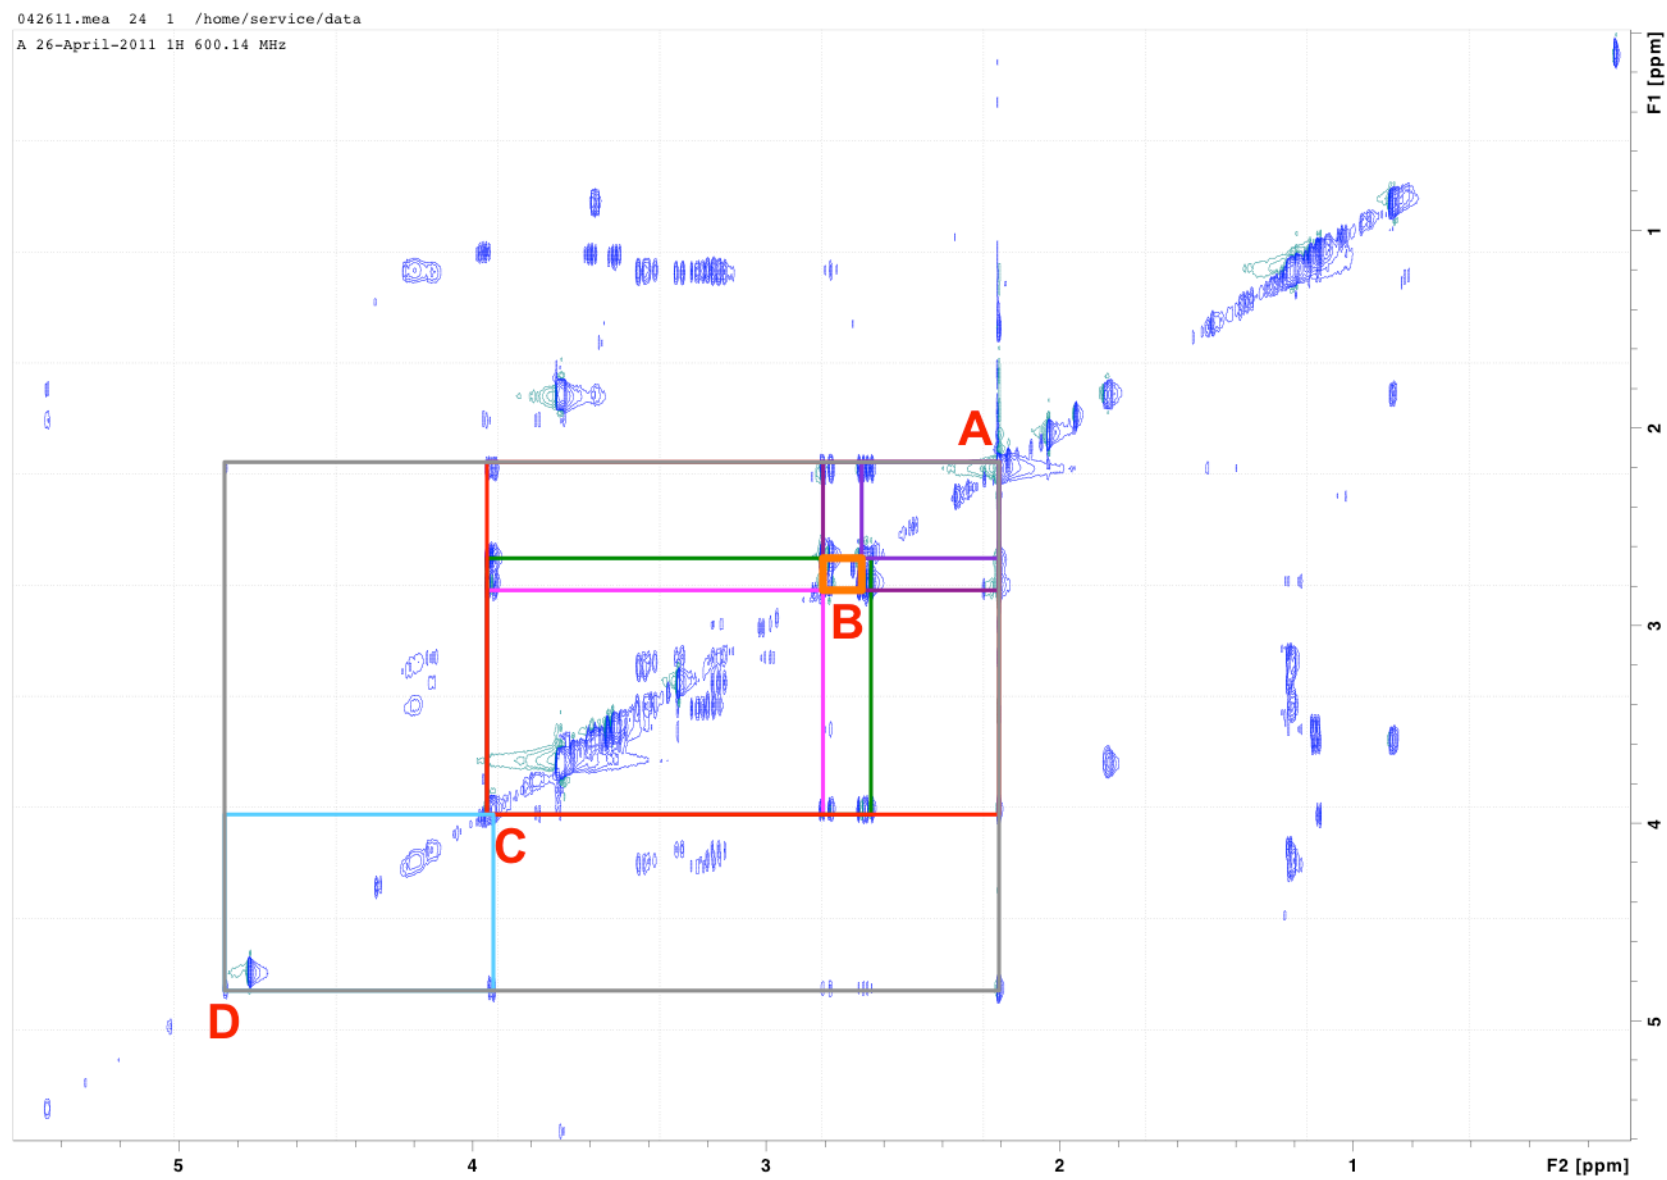

**Figure S 4. COSY NMR Spectrum of Intermediate A**

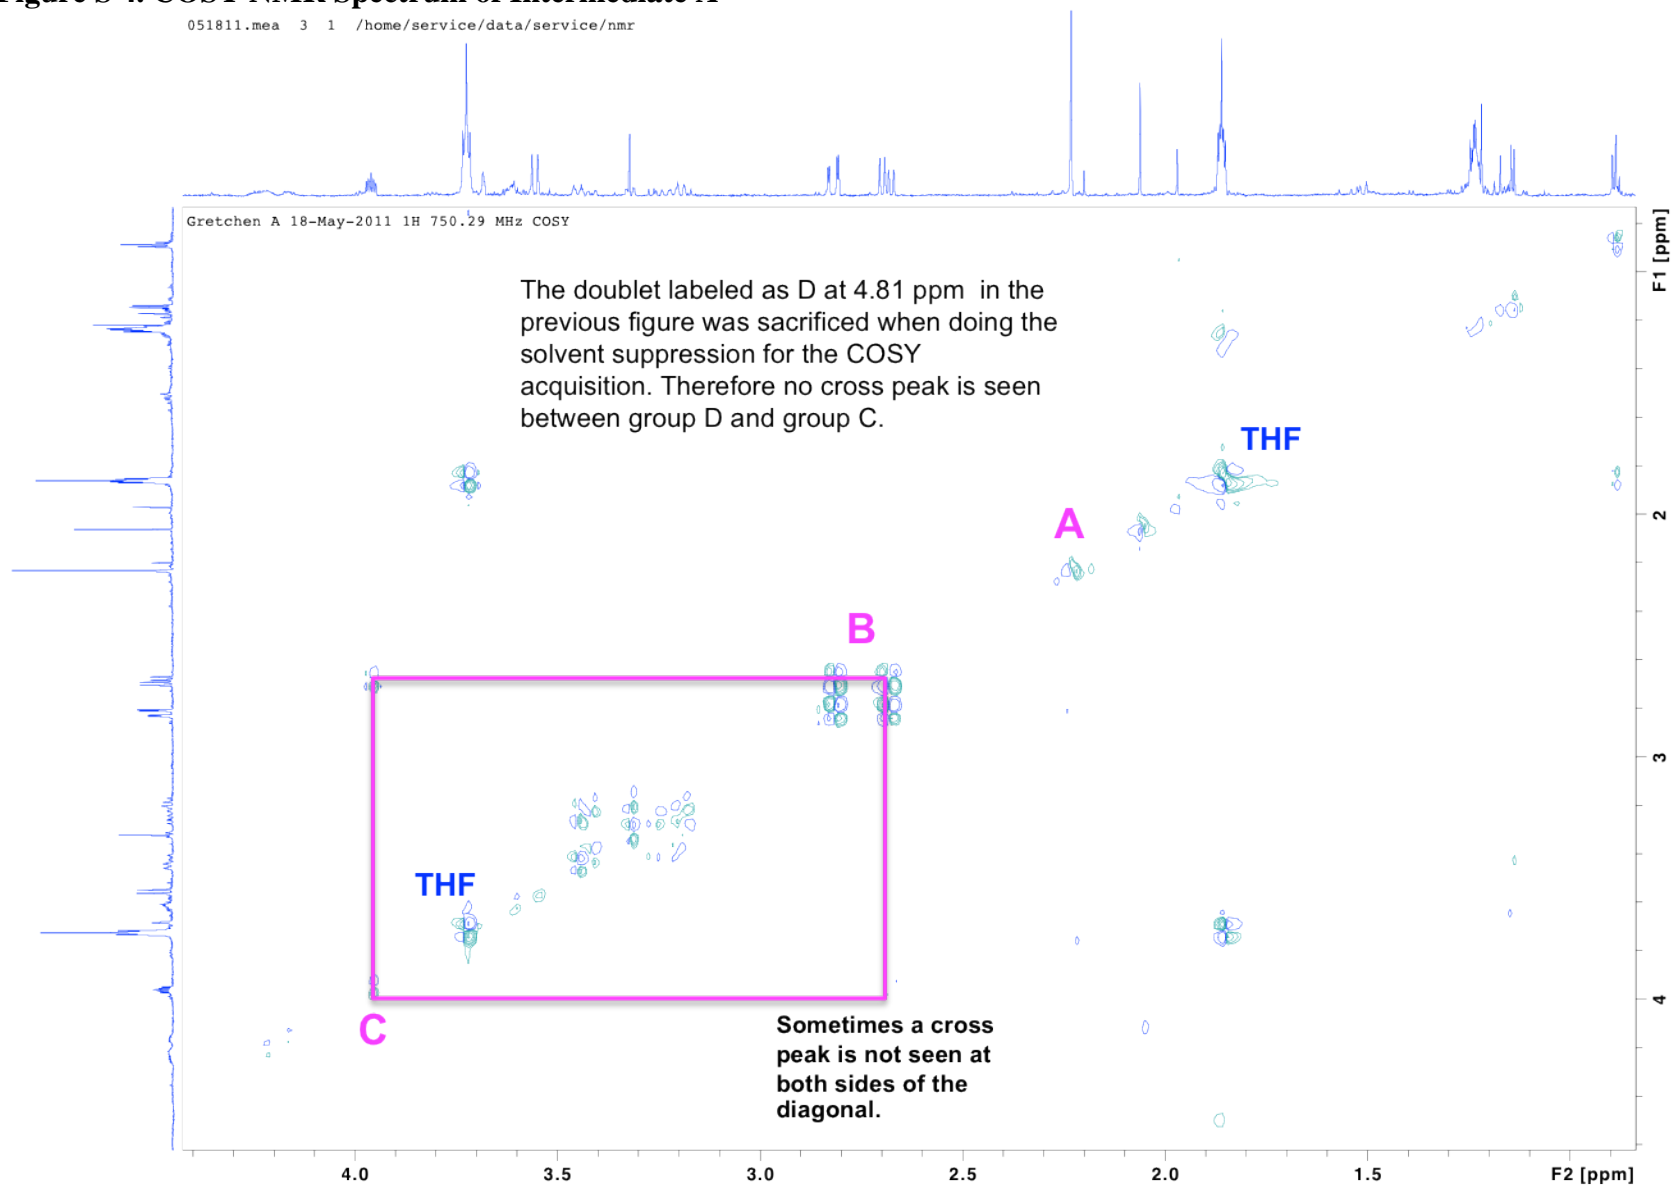

**Figure S 5. TOCSY NMR Spectrum of Intermediate B**

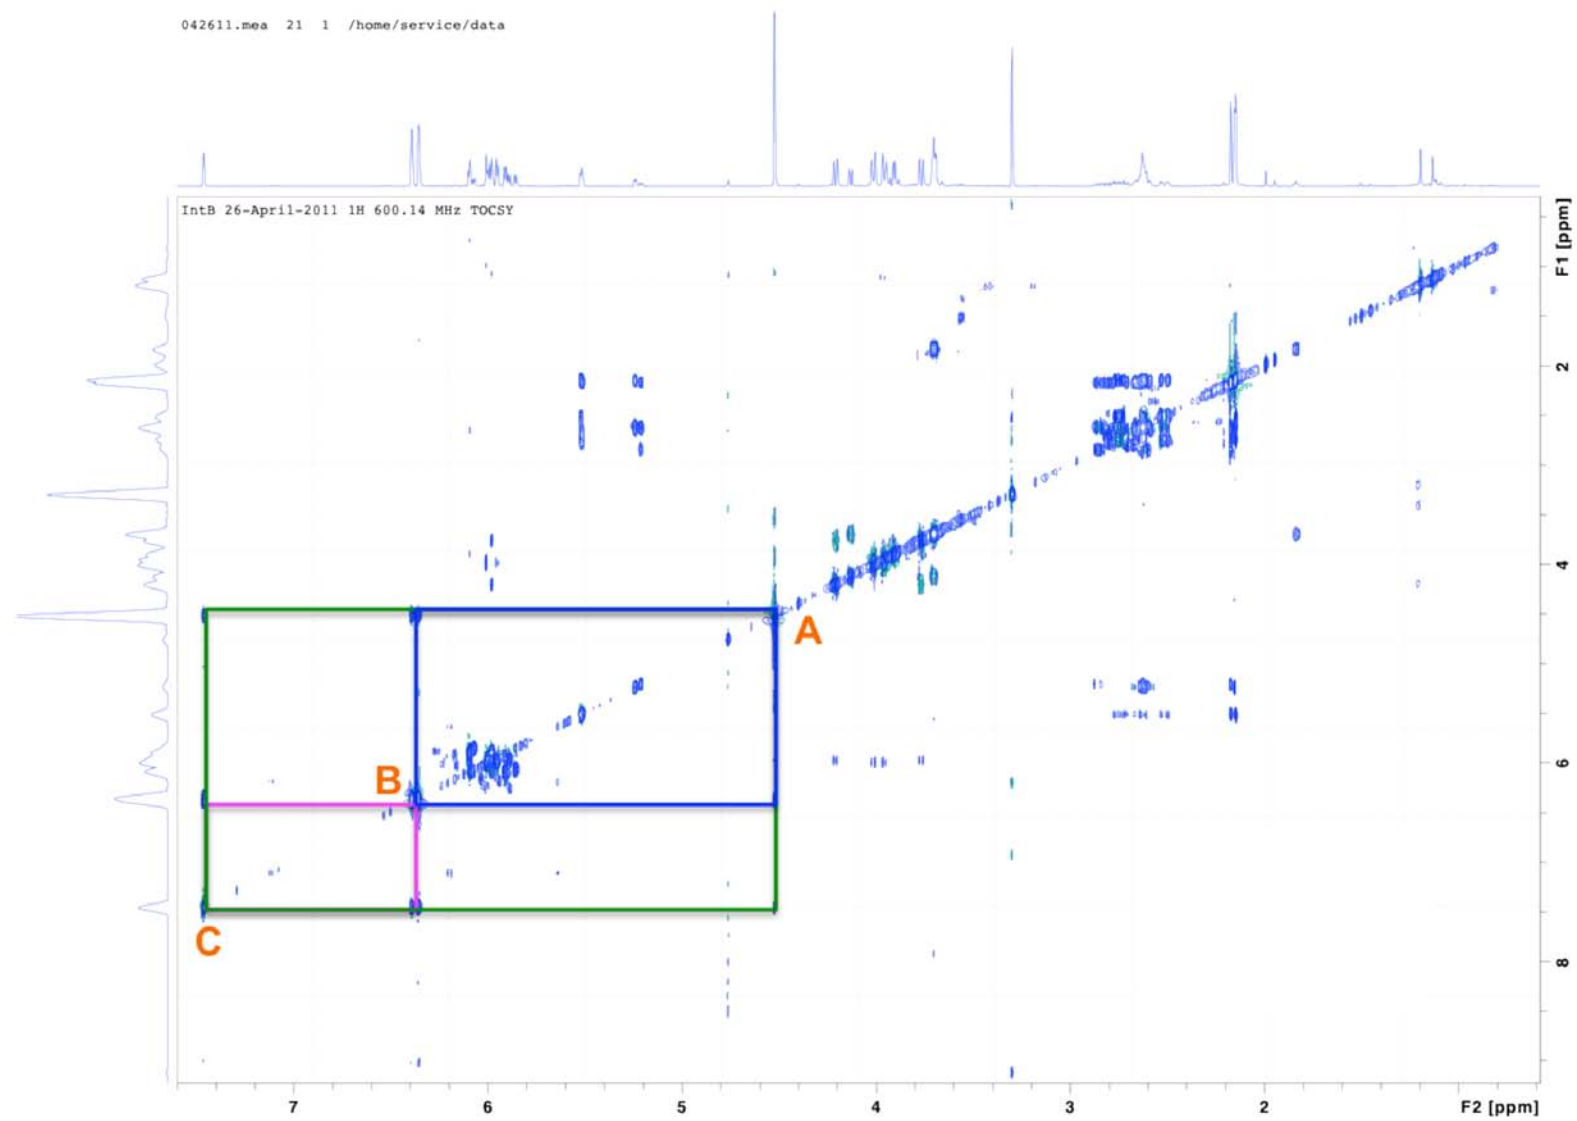



## Computational Studies

### 1. Protonation of Furfuryl alcohol.

**Figure S 4. Computed free energy of protonation of various positions of furfuryl alcohol computed at the G4MP2 level of theory (298 K, in kcal/mol). The solvation free energy contributions were computed using SMD model at the B3LYP/6-31G(2df,p) level of theory. A value of -262.4 kcal/mol is taken into account for the proton solvation energy of aqueous solution.**

## 2. Possible nucleophilic addition reactions with FAL cation

**Figure S 5.** Computed free energies of addition reactions of FAL cation with water at the B3LYP/6-31G(2df,p) level of theory. The solvation contributions to the free energy are calculated using the SMD model at the same level of theory.

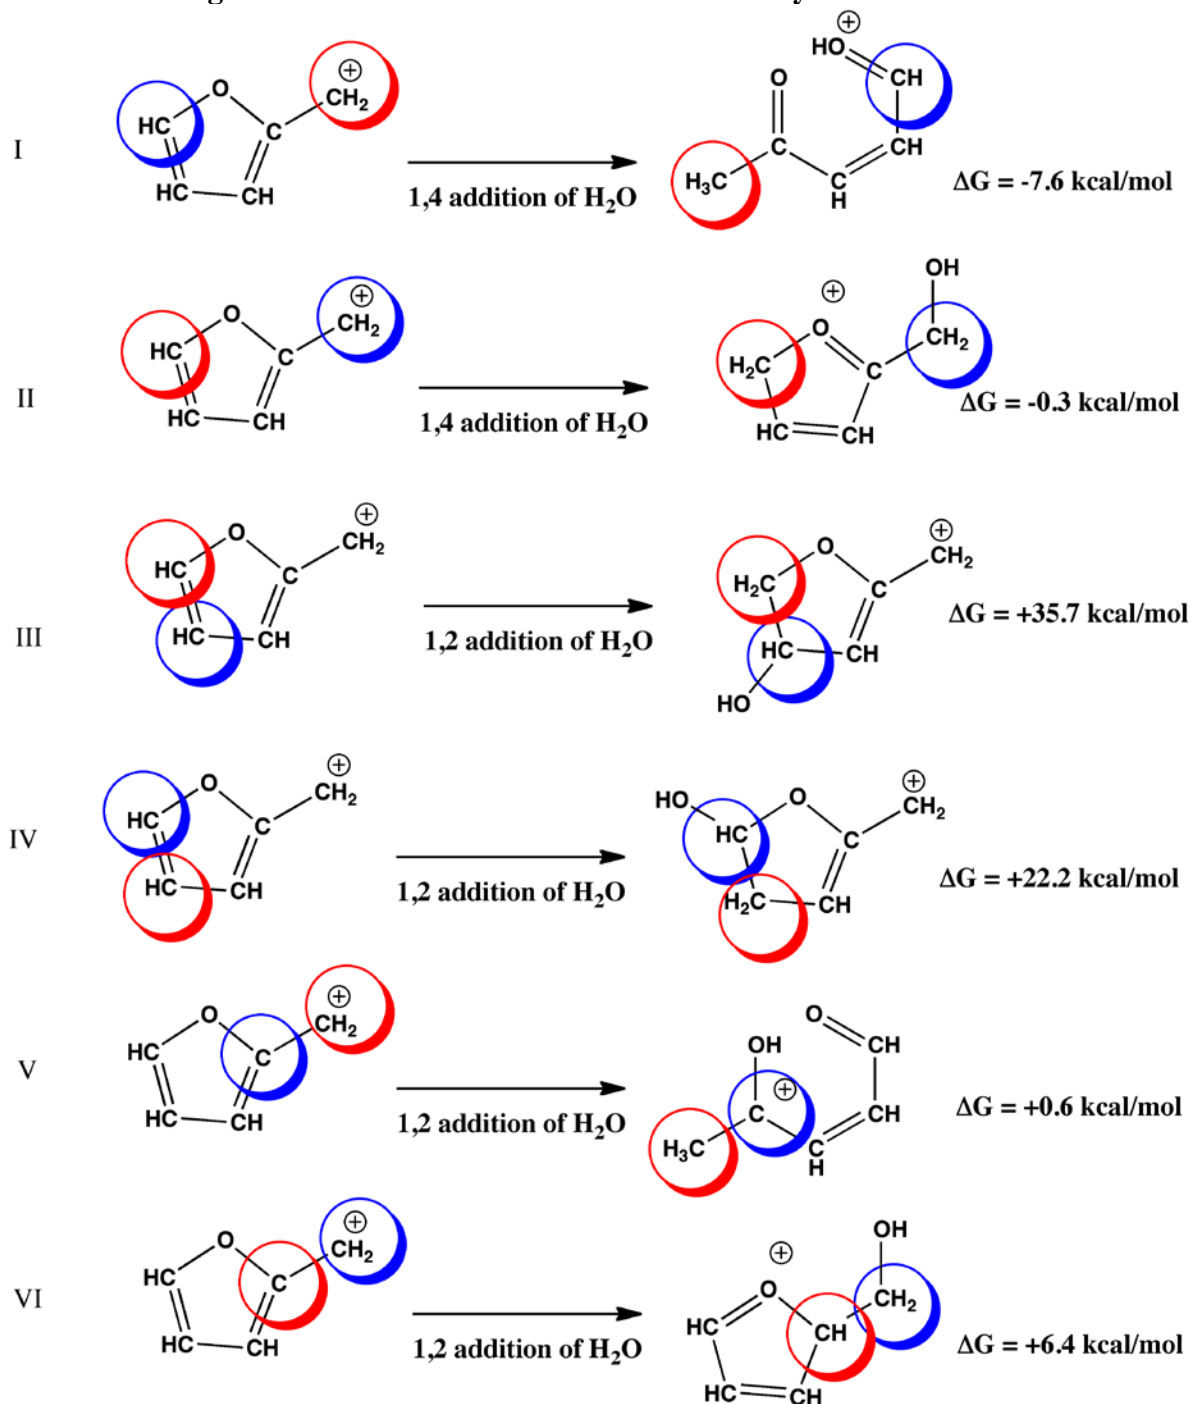

Supplement: c2ee03465d.pdf [file c2ee03465d.pdf]
